# Supplementary material
Source: Research Square preprint supplement (doi:10.21203/rs.3.rs-9360700/v1)
Supplement: Supplementary file 1 [file fa1f3df49e51d193042963fe.docx]

**Appendix**

**Table 1 Five years periods crude rates in cancer incidence and mortality among older adults (≥65 years) by sex and site. Martinique. 2008-2022**

| Sex | Cancer subtype | Incidence  (crude rate per 100.000) | | | Mortality  (crude rate per 100.000) | | |
| --- | --- | --- | --- | --- | --- | --- | --- |
| **2008-2012** | **2013-2017** | **2018-2022** | **2008-2012** | **2013-2017** | **2018-2022** |
| Men | Brain and other nervous system | 13.1 | 13.2 | 10.4 | 14.7 | 13.9 | 9.3 |
| Esophagus | 27.7 | 19.1 | 23.8 | 22.5 | 17.1 | 19.7 |
| Gallbladder | 19.3 | 19.1 | 23.8 | 2.9 | 9.9 | 11.6 |
| Hodgkin lymphoma | 1.5 | 1.3 | 0.6 | 1.9 | 1.3 | 0.6 |
| Larynx | 10.0 | 13.1 | 18.5 | 7.8 | 4.6 | 8.7 |
| Nasal cavity / paranasal sinuses | 1.5 | 4.6 | 2.9 | 0.0 | 0.6 | 1.7 |
| Mesothelioma | 0.8 | 0.0 | 2.3 | 2.9 | 1.3 | 2.3 |
| Melanoma of the skin | 14.6 | 13.8 | 12.8 | 6.8 | 7.2 | 5.2 |
| Male breast | 8.5 | 5.9 | 6.9 | 0.0 | 3.9 | 2.3 |
| Testis | 0.7 | 0.6 | 1.1 | 0.0 | 0.6 | 0.6 |
| Thyroid | 6.9 | 6.6 | 8.1 | 1.9 | 1.9 | 2.3 |
|  | | | | | | | |
| Women | Brain and other nervous system | 6.3 | 6.4 | 5.3 | 6.5 | 7.4 | 4.9 |
| Esophagus | 5.1 | 3.5 | 4.9 | 5.8 | 3.9 | 4.4 |
| Gallbladder | 16.6 | 18.9 | 11.1 | 12.3 | 8.9 | 6.2 |
| Hodgkin lymphoma | 1.1 | 0.0 | 0.9 | 0.7 | 0.5 | 0.0 |
| Larynx | 1.7 | 0.9 | 0.4 | 2.2 | 0.5 | 0.4 |
| Nasal cavity / paranasal sinuses | 1.1 | 0.9 | 0.4 | 0.7 | 0.0 | 0.4 |
| Mesothelioma | 0.0 | 0.0 | 0.4 | 0.0 | 0.5 | 0.4 |
| Melanoma of the skin | 6.9 | 9.4 | 10.2 | 3.6 | 2.5 | 3.9 |
| Thyroid | 11.4 | 16.9 | 11.1 | 1.4 | 1.9 | 3.1 |
